# Supplementary material for: Synergistic effect of sandwich polyoxometalates and copper–imidazole complexes for enhancing the peroxidase-like activity
Source: Royal Society of Chemistry journal article supplement (doi:10.1039/c5ra13265g), 2015-01-01
Supplement: c5ra13265g1.pdf [file c5ra13265g1.pdf]

## Supporting Information

# Synergistic Effect of Sandwich Polyoxometalates and Copper-Imidazole Complexes for Enhancing Peroxidase-like Activity

Dong-Feng Chai,<sup>‡b</sup> Zhuo Ma,<sup>‡d</sup> Hong Yan,<sup>b</sup> Yun-Feng Qiu,<sup>\*a,e</sup> Hong Liu,<sup>\*b</sup> Hua-Dong Guo,<sup>c</sup>  
and Guang-Gang Gao<sup>\*b,c</sup>

<sup>a</sup> State Key Laboratory of Urban Water Resource and Environment, Harbin Institute of Technology, Harbin 150090, China. E-mail: qiuyf@hit.edu.cn (Y. Qiu)

<sup>b</sup> Department of Chemistry, College of Pharmacy, Jiamusi University, Jiamusi 154004, China. E-mail: hliu@jmsu.edu.cn (H. Liu), gaogg@jmsu.edu.cn (G. Gao)

<sup>c</sup> Department of Chemistry, Changchun Normal University, Changchun 130032, China.

<sup>d</sup> School of Life Science and Technology, Harbin Institute of Technology, 92 West Dazhi Street, Harbin, Heilongjiang, 150001, China.

<sup>e</sup> Key Laboratory of Microsystems and Micronanostructures Manufacturing (Ministry of Education), Harbin Institute of Technology, Harbin 150080, China.

<sup>‡</sup> These authors made equal contributions to this work.

## Contents:

- 1) **Fig. S1** FTIR spectra of compounds and precursors.
- 2) **Fig. S2** Dependence of the peroxidase-like activity on concentrations of **1**.
- 3) **Fig. S3** Steady-state kinetic assays of **2**.
- 4) **Fig. S4** Steady-state kinetic assays of BiW<sub>9</sub>Cu<sub>3</sub>.
- 5) **Fig. S5** Steady-state kinetic assays of SbW<sub>9</sub>Cu<sub>3</sub>.
- 6) **Fig. S6** CV curves of **1** in the presence of H<sub>2</sub>O<sub>2</sub>.
- 7) **Fig. S7** FTIR spectra of **1** before (a) and after (b) reaction.
- 8) **Fig. S8** SEM images and EDX of ground **2** before and after reaction.
- 9) **Fig. S9** Thermogravimetric (TG) curves for **1** and **2**.
- 10) **Table S1** Selected bond lengths (Å) and angles (°) for **1**.
- 11) **Table S2** Selected bond lengths (Å) and angles (°) for **2**.

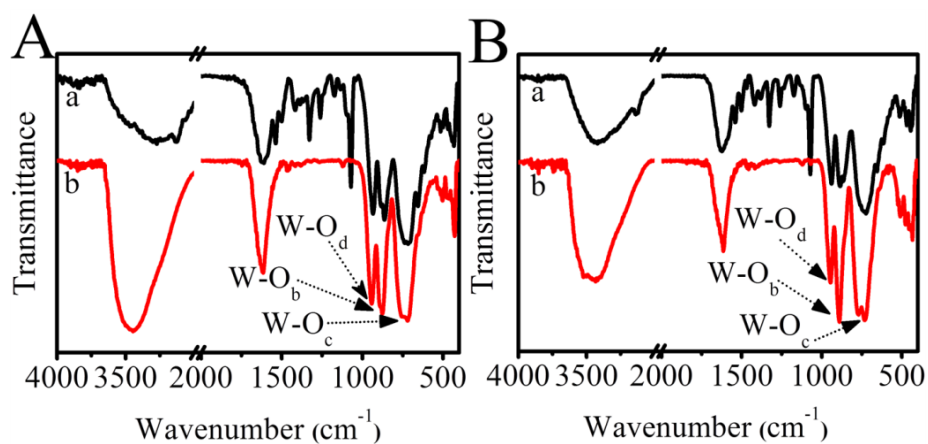

**Fig. S1** (A) FTIR spectra of **1** (a, black curve) and  $\text{BiW}_9\text{Cu}_3$  precursor (b, red curve); (B) FTIR spectra of **2** (a, black curve) and  $\text{SbW}_9\text{Cu}_3$  precursor (b, red curve).

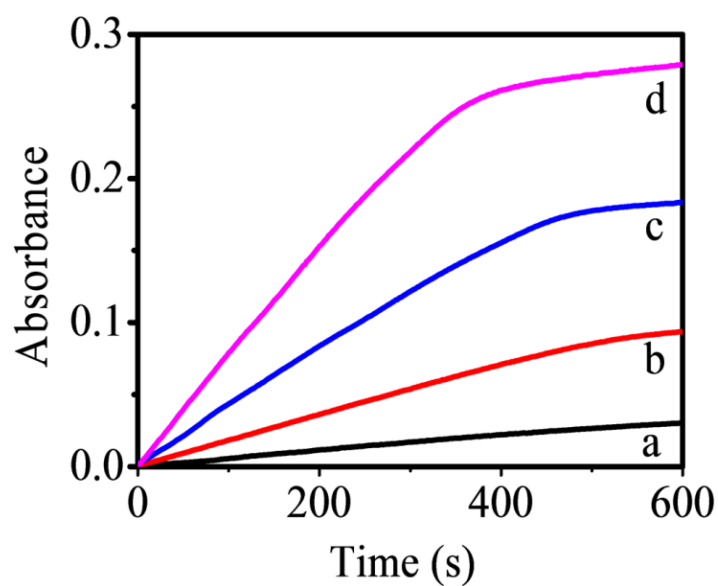

**Fig. S2** Dependence of the peroxidase-like activity on the concentrations of **1** (a:  $0.35 \times 10^{-2}$  mg/mL, b:  $0.69 \times 10^{-2}$  mg/mL, c:  $1.38 \times 10^{-2}$  mg/mL, and d:  $2.76 \times 10^{-2}$  mg/mL). Experiments were conducted in time course mode in acetate buffer solution (pH = 5.5) at 55 °C.

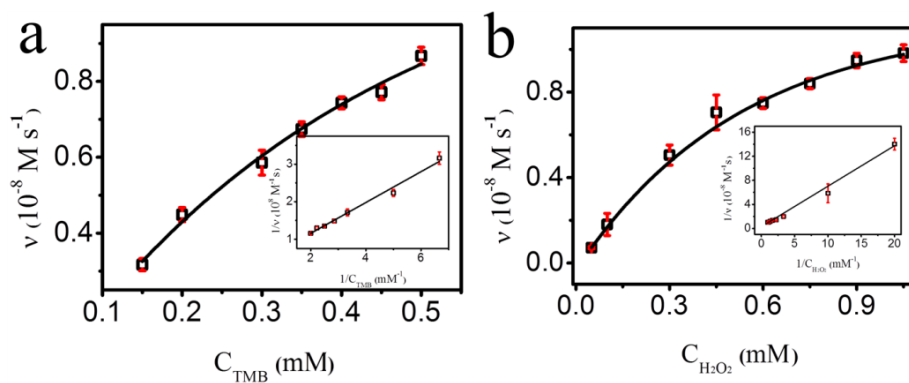

**Fig. S3** Steady-state kinetic assays of **2**. (a)  $\text{H}_2\text{O}_2$  concentration was kept constant at  $100 \mu\text{M}$  and TMB concentration was varied. (b) TMB concentration was maintained at  $50 \mu\text{M}$  and  $\text{H}_2\text{O}_2$  concentration was varied. The reaction was performed in  $0.1 \text{ M}$ ,  $\text{pH} = 5.5$  acetate buffer solution at  $55 \text{ }^\circ\text{C}$ . Details were described in the experimental section.

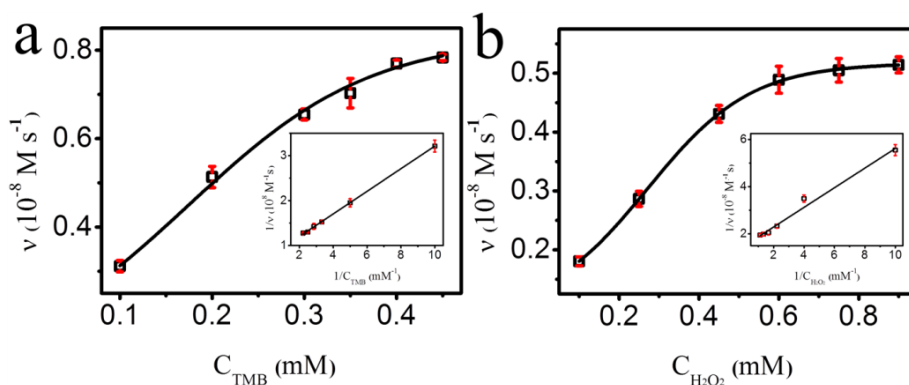

**Fig. S4** Steady-state kinetic assays of  $\text{BiW}_9\text{Cu}_3$ . (a)  $\text{H}_2\text{O}_2$  concentration was kept constant at  $100 \mu\text{M}$  and TMB concentration was varied. (b) TMB concentration was maintained at  $50 \mu\text{M}$  and  $\text{H}_2\text{O}_2$  concentration was varied. The reaction was performed in  $0.1 \text{ M}$ ,  $\text{pH} = 5.5$  acetate buffer solution at  $55 \text{ }^\circ\text{C}$ . Details were described in the experimental section.

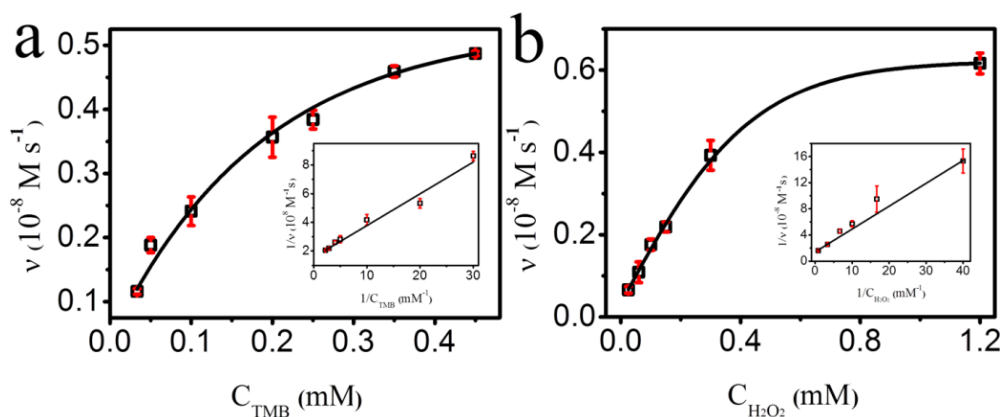

**Fig. S5** Steady-state kinetic assays of  $\text{SbW}_9\text{Cu}_3$ . (a)  $\text{H}_2\text{O}_2$  concentration was kept constant at  $100 \mu\text{M}$  and TMB concentration was varied. (b) TMB concentration was maintained at  $50 \mu\text{M}$  and  $\text{H}_2\text{O}_2$  concentration was varied. The reaction was performed in  $0.1 \text{ M}$ ,  $\text{pH} = 5.5$  acetate buffer solution at  $55 \text{ }^\circ\text{C}$ . Details were described in the experimental section.

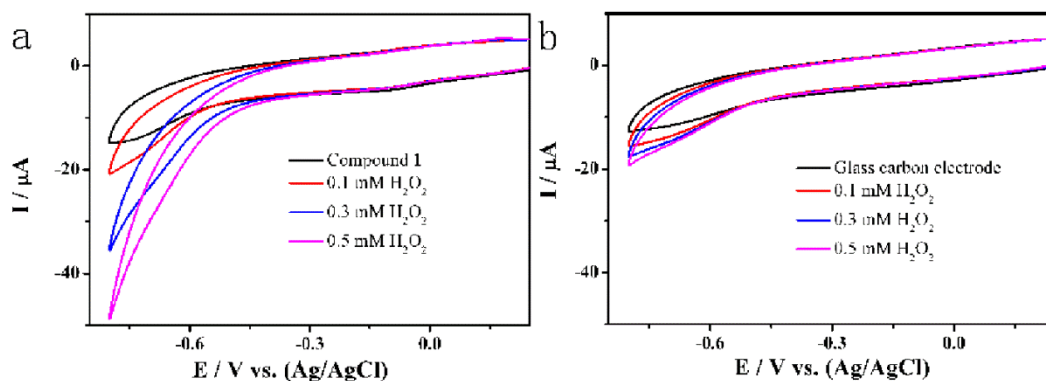

**Fig. S6** CV curves of glass carbon electrode modified with (a) and without (b) compound **1** in the presence of  $0.1$ ,  $0.3$ , and  $0.5 \text{ mM}$   $\text{H}_2\text{O}_2$ .

We have performed the cyclic voltammetry (CV) experiment of compound **1** as representative. Compound **1** was anchored on the glass carbon (GC) electrode surface by small amount of Nafion solution ( $5 \text{ wt}\%$ , Sigma Aldrich) for enhancing CV stability. As shown in **Fig. S6**, the reversible peak of  $\text{Cu}(\text{II})/\text{Cu}(\text{I})$  was not observed on bare GC, and also silent on GC with compound **1**. However, comparing with the weak signals of electro-

catalytic reduction of  $\text{H}_2\text{O}_2$  on bare GC, the signals on GC modified with compound **1** became larger. This might be related to the electro-catalytic reduction ability of compound **1**, and also high affinity between  $\text{H}_2\text{O}_2$  and compound **1**. Further, as reported in previous work, polyoxometalates will facilitate the electro transfer from sensing targets to electron collector. Thus, this effect will also contribute to the enhancement of reducing signals of  $\text{H}_2\text{O}_2$  on GC with compound **1**.

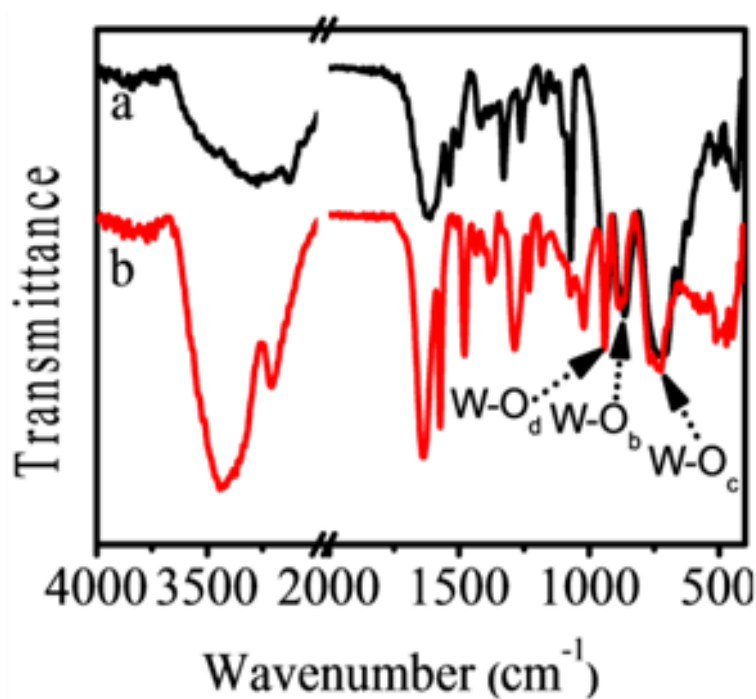

**Fig. S7** FTIR spectra of **1** before (a) and after (b) reaction.

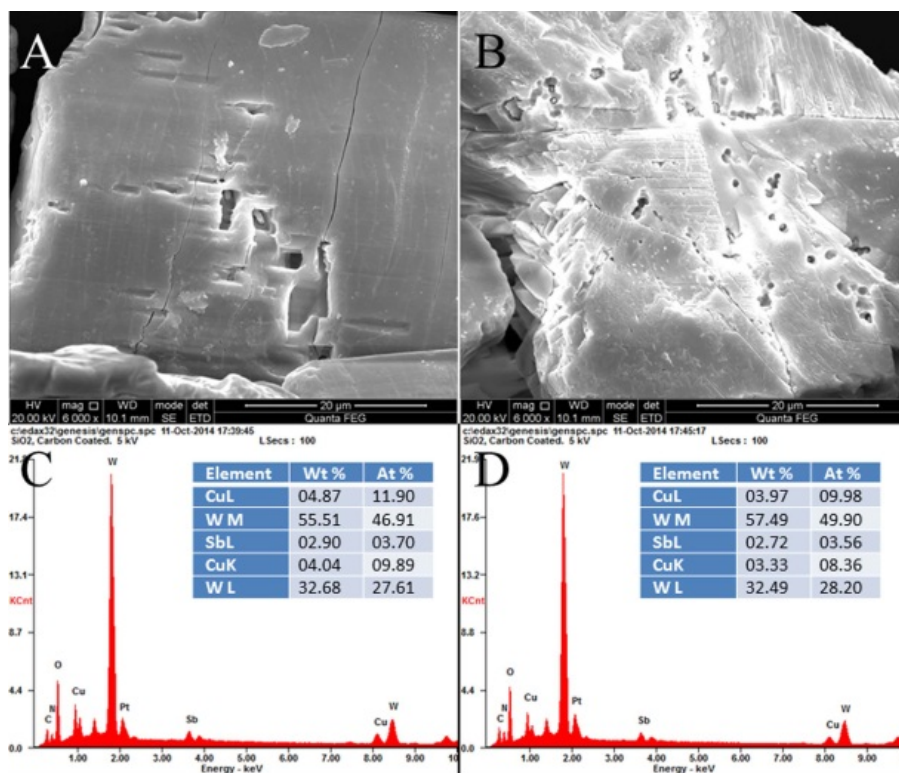

**Fig. S8** (A) and (B) SEM images of ground compound **2** before and after reaction; (C) and (D) EDX before and after reaction. EDX are measured for three times to check out the consistency.

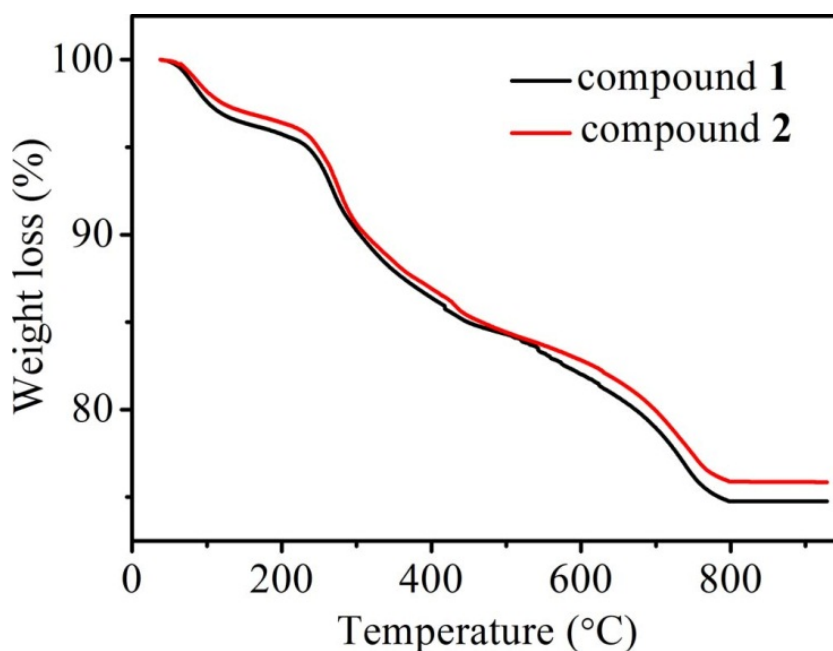

**Fig. S9** TG curves for **1** and **2**.

TG analyses were performed on a NETZSCH TG 209F3 instrument under N<sub>2</sub> atmosphere with a heating rate of 10 K min<sup>-1</sup>. The TG curve of **1** exhibits a two-step continuous weight loss process: the weight loss of 4.91% (calcd 5.00%) from 37 to 235 °C corresponds to the loss of *ca.* 19 lattice water molecules. The weight loss of 17.19% (calcd 17.08%) from 235 to 715 °C corresponds to coordinated water molecules and the decomposition of organic ligands. The TG curve of **2** exhibits a two-step continuous weight loss process: the weight loss of 4.31% (calcd 4.36%) from 37 to 235 °C corresponds to the loss of *ca.* 16 lattice water molecules. The weight loss of 17.59% (calcd 17.68%) from 235 to 730 °C corresponds to coordinated water molecules and the decomposition of organic ligands.

**Table S1** Selected bond lengths (Å) and angles (°) for compound **1**.



| Compound 1       |           |                       |           |               |           |
|------------------|-----------|-----------------------|-----------|---------------|-----------|
| Bi-O(32)         | 2.107(10) | W(6)-O(17)            | 2.006(12) | Cu(1)-O(19)   | 1.955(11) |
| Bi-O(31)         | 2.134(10) | W(6)-O(15)            | 2.010(11) | Cu(1)-O(34)   | 2.29(2)   |
| Bi-O(33)         | 2.135(10) | W(6)-O(33)            | 2.234(10) | Cu(3)-O(22)#1 | 1.952(11) |
| W(3)-O(7)        | 1.694(10) | W(9)-O(29)            | 1.669(12) | Cu(3)-O(22)   | 1.952(11) |
| W(3)-O(21)       | 1.796(11) | W(9)-O(17)            | 1.887(11) | Cu(3)-O(23)#1 | 1.967(12) |
| W(3)-O(6)        | 1.957(11) | W(9)-O(30)            | 1.902(11) | Cu(3)-O(23)   | 1.967(12) |
| W(3)-O(9)        | 1.972(10) | W(9)-O(28)            | 1.943(10) | Cu(3)-O(40)   | 2.33(2)   |
| W(3)-O(8)        | 2.002(11) | W(9)-O(14)            | 1.967(10) | C(1)-N(1)     | 1.36(2)   |
| W(3)-O(32)       | 2.233(10) | W(9)-O(33)            | 2.317(10) | C(1)-C(2)     | 1.37(3)   |
| W(6)-O(16)       | 1.702(11) | Cu(1)-O(24)           | 1.946(11) | C(2)-N(2)     | 1.33(2)   |
| W(6)-O(24)       | 1.813(11) | Cu(1)-O(24)#1         | 1.946(11) | C(3)-N(1)     | 1.31(2)   |
| W(6)-O(18)       | 1.918(11) | Cu(1)-O(19)#1         | 1.955(11) | C(3)-N(2)     | 1.35(2)   |
| O(32)-Bi-O(31)   | 86.4(4)   | O(28)-W(9)-O(33)      | 85.8(4)   |               |           |
| O(32)-Bi-O(33)   | 87.7(4)   | O(14)-W(9)-O(33)      | 72.5(4)   |               |           |
| O(31)-Bi-O(33)   | 86.6(4)   | O(24)-Cu(1)-O(24)#1   | 90.5(7)   |               |           |
| O(1)-W(1)-O(19)  | 104.7(6)  | O(24)-Cu(1)-O(19)#1   | 164.4(5)  |               |           |
| O(1)-W(1)-O(3)   | 97.4(5)   | O(24)#1-Cu(1)-O(19)#1 | 86.0(5)   |               |           |
| O(19)-W(1)-O(3)  | 92.4(5)   | O(24)-Cu(1)-O(19)     | 86.0(5)   |               |           |
| O(1)-W(1)-O(18)  | 101.4(5)  | O(24)#1-Cu(1)-O(19)   | 164.4(5)  |               |           |
| O(19)-W(1)-O(18) | 87.0(5)   | O(19)#1-Cu(1)-O(19)   | 93.2(7)   |               |           |
| O(3)-W(1)-O(18)  | 160.7(5)  | O(24)-Cu(1)-O(34)     | 99.1(5)   |               |           |
| O(1)-W(1)-O(2)   | 97.1(5)   | O(24)#1-Cu(1)-O(34)   | 99.1(5)   |               |           |
| O(19)-W(1)-O(2)  | 158.0(5)  | O(19)#1-Cu(1)-O(34)   | 96.4(5)   |               |           |
| O(3)-W(1)-O(2)   | 87.8(4)   | O(19)-Cu(1)-O(34)     | 96.4(5)   |               |           |

Symmetry transformations used to generate equivalent atoms: #1 x, -y+3/2, z

**Table S2** Selected bond lengths (Å) and angles (°) for compound 2.

---

Compound 2

---

|                  |          |                       |          |             |           |
|------------------|----------|-----------------------|----------|-------------|-----------|
| Sb-O(33)         | 1.991(7) | W(6)-O(18)            | 1.946(7) | Cu(1)-O(19) | 1.954(8)  |
| Sb-O(31)         | 1.996(7) | W(6)-O(17)            | 2.009(8) | Cu(1)-O(36) | 2.359(13) |
| Sb-O(32)         | 1.997(7) | W(6)-O(31)            | 2.258(7) | Cu(4)-N(3)  | 1.951(12) |
| W(3)-O(7)        | 1.727(9) | W(9)-O(30)            | 1.705(8) | Cu(4)-N(1)  | 1.959(11) |
| W(3)-O(21)       | 1.804(8) | W(9)-O(27)            | 1.886(8) | Cu(4)-N(7)  | 1.965(11) |
| W(3)-O(9)        | 1.907(8) | W(9)-O(14)            | 1.908(7) | Cu(4)-N(5)  | 1.992(11) |
| W(3)-O(8)        | 1.989(8) | W(9)-O(26)            | 1.909(7) | Cu(5)-N(8)  | 1.952(11) |
| W(3)-O(6)        | 1.992(8) | W(9)-O(11)            | 1.921(8) | Cu(5)-N(11) | 1.954(15) |
| W(3)-O(32)       | 2.281(7) | W(9)-O(33)            | 2.316(7) | Cu(5)-N(9)  | 1.972(11) |
| W(6)-O(16)       | 1.729(7) | Cu(1)-O(20)#1         | 1.946(8) | Cu(5)-N(13) | 2.020(11) |
| W(6)-O(24)       | 1.794(7) | Cu(1)-O(20)           | 1.946(8) | Cu(5)-O(30) | 2.421(8)  |
| W(6)-O(15)       | 1.942(7) | Cu(1)-O(19)#1         | 1.954(8) | C(1)-N(2)   | 1.33(3)   |
| O(33)-Sb-O(31)   | 90.5(3)  | O(26)-W(9)-O(33)      | 86.3(3)  |             |           |
| O(33)-Sb-O(32)   | 90.4(3)  | O(11)-W(9)-O(33)      | 73.5(3)  |             |           |
| O(31)-Sb-O(32)   | 91.7(3)  | O(20)#1-Cu(1)-O(20)   | 88.7(5)  |             |           |
| O(1)-W(1)-O(19)  | 103.8(4) | O(20)#1-Cu(1)-O(19)#1 | 89.4(3)  |             |           |
| O(1)-W(1)-O(3)   | 102.7(4) | O(20)-Cu(1)-O(19)#1   | 168.1(3) |             |           |
| O(19)-W(1)-O(3)  | 90.3(3)  | O(20)#1-Cu(1)-O(19)   | 168.1(3) |             |           |
| O(1)-W(1)-O(18)  | 97.3(3)  | O(20)-Cu(1)-O(19)     | 89.4(3)  |             |           |
| O(19)-W(1)-O(18) | 91.4(3)  | O(19)#1-Cu(1)-O(19)   | 90.1(5)  |             |           |
| O(3)-W(1)-O(18)  | 158.9(3) | O(20)#1-Cu(1)-O(36)   | 98.3(4)  |             |           |
| O(1)-W(1)-O(2)   | 97.5(3)  | O(20)-Cu(1)-O(36)     | 98.3(4)  |             |           |
| O(19)-W(1)-O(2)  | 158.7(3) | O(19)#1-Cu(1)-O(36)   | 93.6(3)  |             |           |
| O(3)-W(1)-O(2)   | 86.5(3)  | O(19)-Cu(1)-O(36)     | 93.6(3)  |             |           |

---

Symmetry transformations used to generate equivalent atoms: #1 x, -y+3/2, z
